# Supplementary material for: Embryonic signature distinguishes pediatric and adult rhabdoid tumors from other SMARCB1-deficient cancers
Source: PubMed Central journal article supplement (PMC5470964; doi:10.18632/oncotarget.15939), 2017-03-06
Supplement: oncotarget-08-34245-s001.pdf [file oncotarget-08-34245-s001.pdf]

# Embryonic signature distinguishes pediatric and adult rhabdoid tumors from other SMARCB1-deficient cancers

## Supplementary Materials

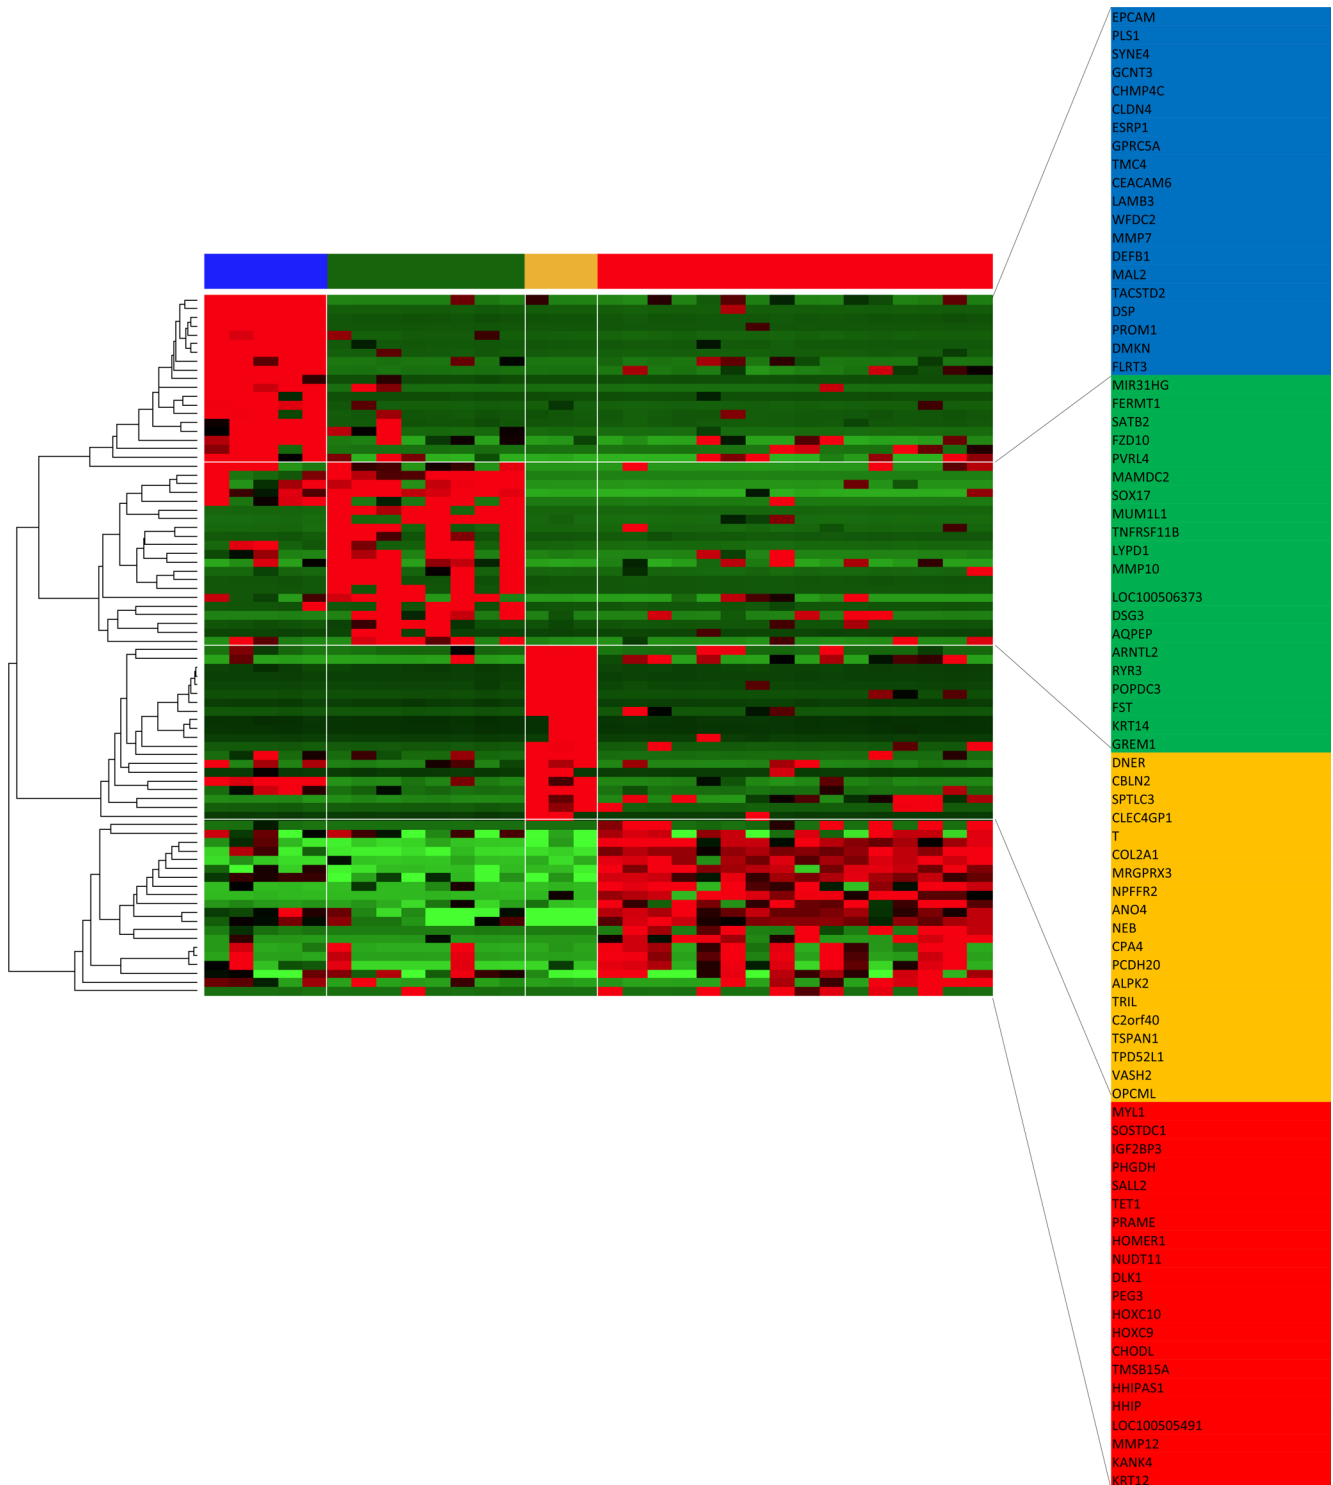

**Supplementary Figure 1: Heat-map of training set tumors on a set of genes obtained by pair-wised analysis. RMC are indicated in blue, UC in yellow, ES in green and RT in red. The detail of genes used for these signatures is depicted on the right column.**

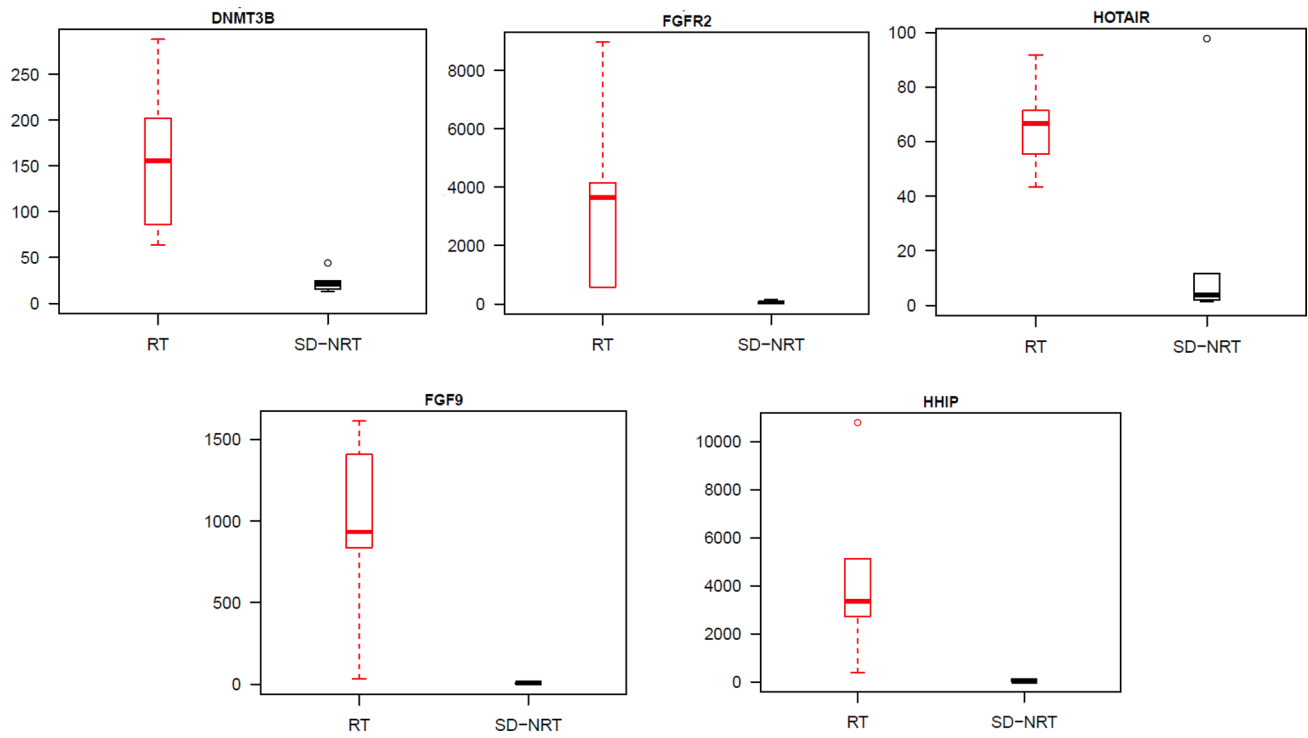

**Supplementary Figure 2: RT-PCR confirmation on a short list of differentially expressed genes, in RT and SD-NRT.** In y axis, expression level as N-fold differences in target gene expression relative to the *TBP* control gene based on the  $2^{-\Delta\Delta CT}$  method.

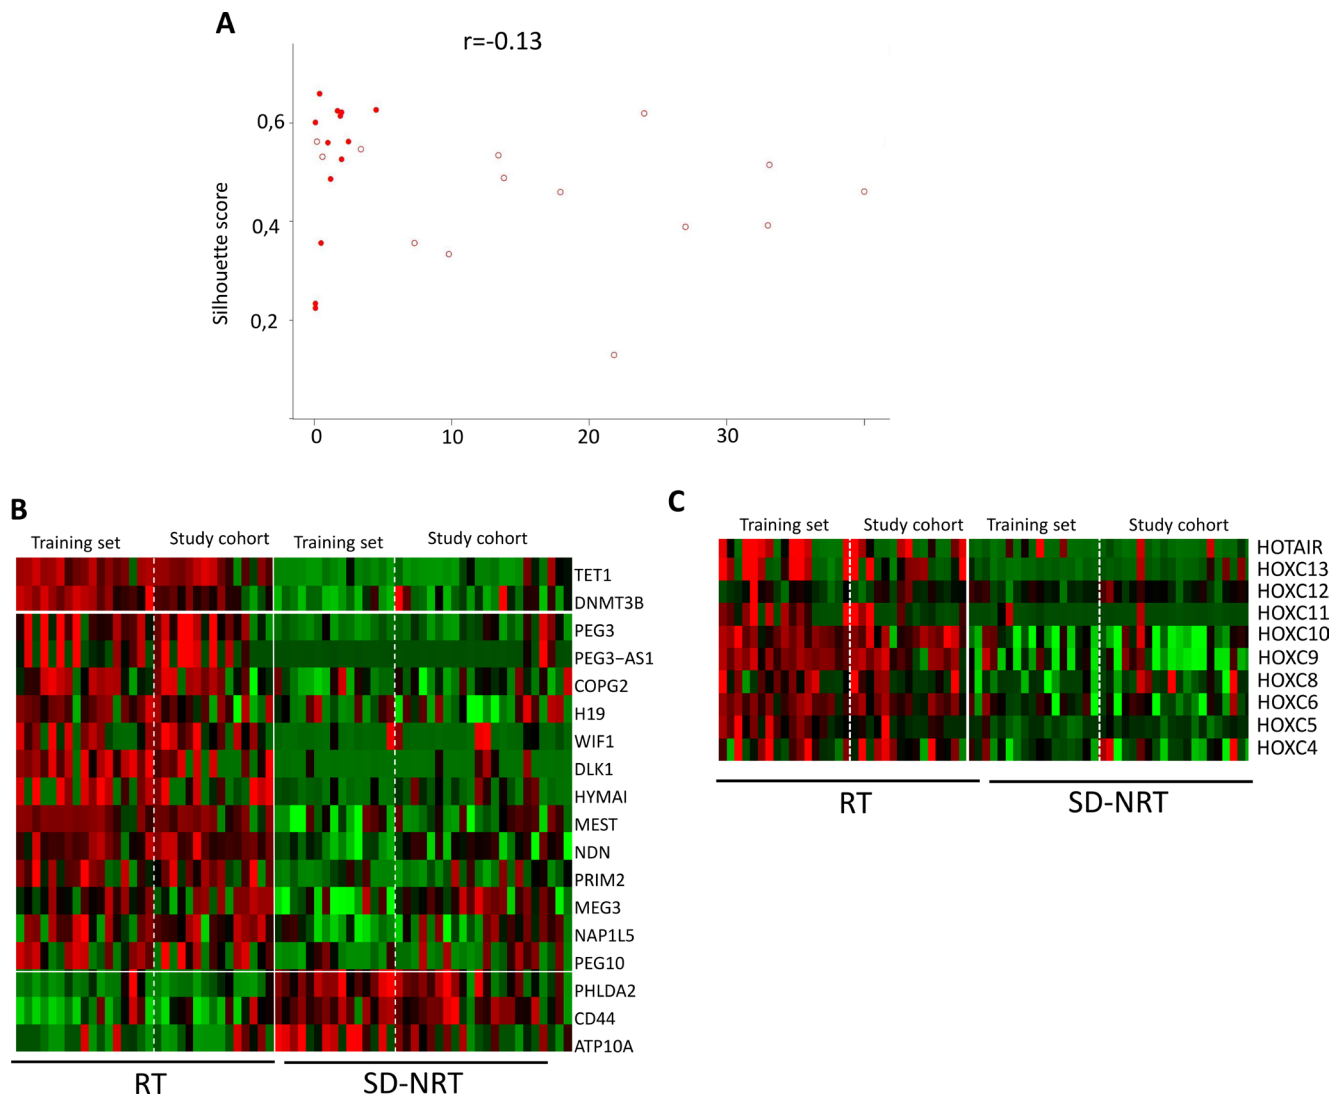

**Supplementary Figure 3: Features of adult RT compared with pediatric RT.** (A) Silhouette score is plotted according to age at diagnosis; full red circles and empty red circles represent RT from the training set, and the study cohort, respectively; no correlation nor anti-correlation ( $r = -0.13$ ). (B) Heat-map on tumors from the training set and the study set showing imprinted genes; the list is defined by differential expression between RT and SD-NRT in the training set; (C) Heat-map showing HOX clusters and HOTAIR HOX genes-regulator, in RT (i.e. RT from training set + study cohort tumors clustering with RT) and SD-NRT (i.e. SD-NRT from training set + study cohort tumors clustering with SD-NRT)

**Supplementary Table 1: Clinical outcome of late-onset RT**

| Meta.         | Size                        | Delay from first symptoms | Chemotherapy regimen | Surgery                      | Radiotherapy In Grays | Best response |    |
|---------------|-----------------------------|---------------------------|----------------------|------------------------------|-----------------------|---------------|----|
| <b>RT</b>     |                             |                           |                      |                              |                       |               |    |
| INI44         | NA                          | NA                        | NA                   | NA                           | NA                    | NA            |    |
| INI61         | M0                          | > 5 cm2                   | NA                   | CyCE<br>VDCy                 | R1                    | 54Gy          | CR |
| INI64         | M+<br>Soft tissue,<br>bones | NA                        | 1 year               | CAdO/VP-CBP<br>Nvb-CPM       | None                  | 20Gy          | PD |
| INI105        | M0                          | > 5 cm2                   | NA                   | None                         | R1                    | None          | PR |
| INI120        | M0                          | > 5 cm2                   | 3weeks               | CyCE<br>VAC                  | R0                    | 45Gy          | CR |
| INI127        | N+                          | < 5 cm2                   | 6 months             | AI x6                        | None                  | 44Gy          | CR |
| INI135        | M0                          | > 5 cm2                   | NA                   | NA                           | NA                    | NA            | NA |
| INI136        | M0                          | > 5 cm2                   | 8 months             | CyCE<br>VDCy                 | None                  | 54Gy          | PR |
| INI143        | M0                          | > 5 cm2                   | 2 weeks              | CyCE<br>VDCy                 | R0                    | 45Gy          | CR |
| INI174        | M+<br>Bone                  | > 5 cm2                   | 2 months             | VP16-Ifo<br>3x Dox<br>VP-CPM | 0                     | 0             | PR |
| INI176        | M+<br>Soft tissue           | > 5 cm2                   | NA                   | NA                           | NA                    | NA            | NA |
| INI185        | NA                          | NA                        | NA                   | NA                           | NA                    | NA            | NA |
| <b>SD-NRT</b> |                             |                           |                      |                              |                       |               |    |
| INI20         | M+<br>Bone                  | > 5 cm2                   | 2 months             | VP16-CBP<br>ICE, CAdO        | None                  | None          | PD |
| INI37         | N+                          | > 5 cm2                   | 6 weeks              | AE<br>ICE                    | None                  | 30Gy          | PD |
| INI65         | M+<br>Lung                  | > 5 cm2                   | >12 months           | Unknown                      | R2                    | None          | PD |
| INI86         | NA                          | NA                        | NA                   | NA                           | NA                    | NA            | NA |
| INI114        |                             | > 5 cm2                   | 11 months            | NA                           | NA                    | NA            | NA |
| INI115        | M0                          | < 5 cm2                   | NA                   | None                         | R0                    | 60Gy          | CR |
| INI117        | M0                          | > 5 cm2                   | 1 month              | VP16                         | R2                    | None          | PD |
| INI123        | M+<br>Liver                 | > 5 cm2                   | NA                   | DVCP<br>MAID                 | None                  | None          | SD |
| INI128        | M0                          | NA                        | NA                   | NA                           | NA                    | NA            | NA |
| INI129        | NA                          | NA                        | NA                   | NA                           | NA                    | NA            | NA |
| INI130        | M0                          | > 5 cm2                   | 3 months             | Ifo-Doxo                     | R0                    | 41Gy          | CR |
| INI131        | M0                          | > 5 cm2                   | NA                   | CDDP-PMT<br>VCR-Doxo         | None                  | None          | PD |
| INI132        | M0                          | > 5 cm2                   | NA                   | HD MTX<br>CHOP               | R0                    | 60Gy          | CR |
| INI133        | M0                          | > 5 cm2                   | 3 months             | Ifo-Doxo                     | R0                    | 50.4Gy        | CR |
| INI134        | N+                          | > 5 cm2                   | NA                   | None                         | None                  | None          | PD |
| INI152        | Bone,<br>Lung               | > 5 cm2                   | 1 month              | Doxo                         | None                  | None          | PD |
| INI175        | M0                          | > 5 cm2                   | 3 months             | VDCy<br>CyCE                 | R1                    | 55Gy          | PR |
| INI182        | M+<br>lung                  | > 5 cm2                   | 2 months             | NA                           | R0                    | None          | SD |

Meta.: metastatic status NA: data not available. M0: no metastasis. N+: lymph node involvement. M+: other metastasis. VIDE: Vincristine, Ifosfamide, Doxorubicin, Etoposide. CyCE: Cyclophosphamide, Carboplatin, Etoposide. VDCy : Vincristin, Doxorubicin, Cyclophosphamide. Doxo : doxorubicin. Ifo : Ifosfamide. VP16-CBP : Etoposide, Carboplatin. CAdO : Cyclophosphamide, Doxorubicin, Vincristin. VAC : Vincristin, Actinomycin, Cyclophosphamide. CDDP-PMT : Cisplatin, Pemetrexed. HD MTX: Methotrexate, High doses. CHOP: Cyclophosphamide, Doxorubicin, Vincristin, Prednisone. R2: macroscopic residue. R1: microscopic residue. R0: no residue. PD: progressive disease. SD: stable disease. PR: partial response. CR: complete response.

**Supplementary Table 2: Differentially expressed genes and pathways, SDNRT vs RT. See Supplementary\_Table\_2**

**Supplementary Table 3: NMF signature for all SMARCB1-deficient tumor types. See Supplementary\_Table\_3**

**Supplementary Table 4: List of significant Single Nucleotide Variants and InDels. See Supplementary\_Table\_4**
